# Supplementary material
Source: publisher site journal article supplement (https://www.spandidos-publications.com/6450/downloadSupplementary)
Supplement: Supplementary file 1 [file downloadSupplementary]

Table SI. Chemical compositions of supercritical carbon dioxide extract from *Chrysanthemum indicum* Linné by gas chromatography-mass spectrometry analysis (>2%) and HPLC analysis.

| Method of analysis                                | Number | Component                   | Retention time (min) | Percentage (%) |
|---------------------------------------------------|--------|-----------------------------|----------------------|----------------|
| Gas chromatography-mass spectrometry <sup>*</sup> | 1      | d-camphor                   | 8.07                 | 8.582          |
|                                                   | 2      | Caryophyllene oxide         | 28.67                | 8.460          |
|                                                   | 3      | Endo-borneol                | 8.72                 | 7.845          |
|                                                   | 4      | $\alpha$ -curcumene         | 24.26                | 5.932          |
|                                                   | 5      | Cis-verbenol                | 8.53                 | 4.720          |
|                                                   | 6      | $\beta$ -caryophyllene      | 20.97                | 3.336          |
|                                                   | 7      | Eucalyptol                  | 5.40                 | 3.091          |
|                                                   | 8      | Thymol                      | 13.81                | 3.071          |
|                                                   | 9      | Bornyl acetate              | 13.59                | 2.948          |
|                                                   | 10     | $\alpha$ -bisabolol oxide   | 33.96                | 2.600          |
|                                                   | 11     | Longifolenaldehyde          | 33.34                | 2.572          |
|                                                   | 12     | Ethyl octadec-9,12-dienoate | 39.45                | 2.470          |
|                                                   | 13     | $\alpha$ -bisabolol         | 32.53                | 2.289          |
|                                                   | 14     | Aromadendrene               | 31.71                | 2.280          |
|                                                   | 15     | cis- $\beta$ -farnesene     | 23.03                | 2.270          |
|                                                   | 16     | $\alpha$ -thujone           | 6.97                 | 2.186          |
|                                                   | 17     | $\beta$ -thujone            | 7.24                 | 2.169          |
|                                                   | 18     | $\alpha$ -gurjunene         | 31.60                | 2.161          |
| HPLC <sup>#</sup>                                 | 19     | $\alpha$ -linolenic acid    | 38.82                | 2.130          |
|                                                   | 20     | Chlorogenic acid            | 9.17                 | 0.296          |
|                                                   | 21     | Luteolin-7-glucoside        | 11.42                | 0.357          |
|                                                   | 22     | Linarin                     | 21.43                | 2.897          |
|                                                   | 23     | Luteolin                    | 24.82                | 1.142          |

<sup>\*</sup>Relative percentage was calculated by integrated peak area using the Agilent MSD Chemstation data analysis program; <sup>#</sup>relative percentage was calculated by quantitatively analyzing peak areas under the standard curves, data were analyzed and quantified using HPLC-pulsed amperometric detection analysis. HPLC, high-performance liquid chromatography.
